# Supplementary material for: Clinical and Acoustic Alterations of Swallowing in Children Exposed to Zika Virus during Pregnancy in a Cohort in Amazonas, Brazil: A Case Series Study
Source: MDPI journal article supplement (doi:10.3390/v15122363), 2023-11-30
Supplement: s1 [file s1]

**Supplementary table 1: Neurological characteristics for microcephalic children.**

| ID | Neurological characteristic                                                                                                                                                                                                                                                                                                                                                                                                       |
|----|-----------------------------------------------------------------------------------------------------------------------------------------------------------------------------------------------------------------------------------------------------------------------------------------------------------------------------------------------------------------------------------------------------------------------------------|
| 4  | <p>Congenital microcephaly, epileptic seizures starting at 4 months of age, West syndrome, global developmental delay (cognition, language, motor, social), deficit in muscle strength with tetraparesis, spasticity, increased osteotendinous reflex response.</p> <p>Skull tomography: lissencephaly, intracranial calcifications at the corticomedullary junction, dilation of the ventricular system and cerebral atrophy</p> |
| 7  | <p>Microcephaly crises, global developmental delay (cognition, language, motor, social), deficit in muscle strength with tetraparesis, spasticity, increased osteotendinous reflex response.</p>                                                                                                                                                                                                                                  |
| 19 | <p>Congenital microcephaly, epileptic seizures starting in the neonatal period, global developmental delay (cognition, language, motor, social), deficit in muscle strength with tetraparesis, spasticity, increased osteotendinous reflex response.</p> <p>Skull tomography lissencephaly, intracranial calcifications, dilatation of the ventricular system and cerebral atrophy</p>                                            |

**Supplementary table 2: Growth velocity in children exposed to the Zika virus in the intrauterine period in Manaus, Amazonas, Brazil.**

| ID | Growth speed           |
|----|------------------------|
| 1  | ND                     |
| 2  | Proper                 |
| 3  | Proper                 |
| 4  | Proper                 |
| 5  | Proper                 |
| 6  | ND                     |
| 7  | ND, appropriate weight |
| 8  | ND                     |
| 9  | Inappropriate          |
| 10 | Proper                 |
| 11 | Proper                 |
| 12 | ND                     |
| 13 | Proper                 |
| 14 | Inappropriate          |
| 15 | ND                     |
| 16 | Proper                 |
| 17 | Proper                 |
| 18 | Proper                 |
| 19 | Proper                 |
| 20 | ND                     |
| 21 | Proper                 |
| 22 | Proper                 |

ID: identification and ND: Not determined. Microcephalic patients are marked in gray.
